# Supplementary material for: An anthracene-containing bistable [2]rotaxane featuring color and fluorescence changes
Source: Royal Society of Chemistry journal article supplement (doi:10.1039/c3ra46517a), 2013-12-12

# Supporting Information

## An Anthracene-Containing Bistable [2]Rotaxane Featuring Color and Fluorescence Changes

Wei Zhou, Ying Wu, Bao-Qi Zhai, Qiao-Chun Wang and Da-Hui Qu\*

Key Laboratory for Advanced Materials and Institute of Fine Chemicals, East China  
University of Science & Technology, Shanghai 200237, P. R. China.  
dahui\_qu@ecust.edu.cn

### Experimental Section

**General method:**  $^1\text{H}$  NMR and  $^{13}\text{C}$  NMR spectra were measured on a Bruker AV-400 spectrometer. The electronic spray ionization (ESI) mass spectra were tested on a LCT Premier XE mass spectrometer. The UV-Vis absorption spectra and fluorescence spectra were obtained on a Varian Cary 100 spectrometer and a Varian Cary Eclipse (1-cm quartz cell used), respectively. The quantum yields of fluorescence were measured by using a Fluoromax-4 fluorescence spectrophotometer equipped with the quantum yield measuring accessory and report generator program.

**Materials:** Chemicals were used as received from Acros, Aldrich. All solvents were reagent grade, which were dried and distilled prior to use according to standard procedures. The molecular structures were confirmed via  $^1\text{H}$  NMR,  $^{13}\text{C}$  NMR and high-resolution ESI mass spectroscopy.

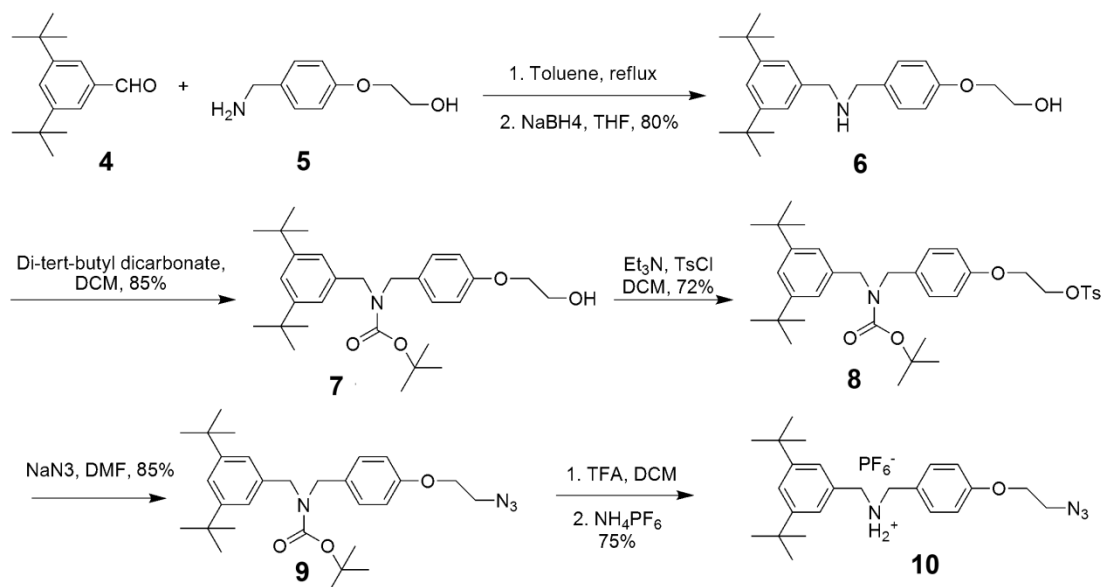

Scheme S1 Synthetic strategy to prepare compound 10

### Synthesis of the compound 6

A mixture of 3,5-Ditert-butylbenzaldehyde (0.65 g, 2.99 mmol) and compound 5 (0.5 g, 2.99 mmol) in dry toluene (70 mL) was refluxed overnight under argon atmosphere. The solvent was removed under vacuum, and the residue was dissolved in THF (50 mL). To the solution was added  $\text{NaBH}_4$  (1.2 g, 30.0 mmol) in portion under ice bath. After the mixture was stirred for overnight,

the solution was poured into water, and the mixture was extracted by DCM (3 × 50 mL). The organic layer was dried over anhydrous sodium sulfate, and then concentrated to give the free amine compound. The residue was purified via column chromatography (SiO<sub>2</sub>, CH<sub>2</sub>Cl<sub>2</sub>/MeOH = 20/1) to give a pale solid **6** (0.88g, 80%). <sup>1</sup>H NMR (CDCl<sub>3</sub>, 400 MHz, 298 K): δ = 7.32 (t, *J* = 1.6 Hz, 1H), 7.26 (d, *J* = 8.8 Hz, 2H), 7.16 (d, *J* = 1.6 Hz, 2H), 6.87 (d, *J* = 8.6 Hz, 2H), 4.06 (m, 2H), 3.93 (m, 2H), 3.77 (d, *J* = 6.4 Hz, 4H), 1.33 (s, 18H). <sup>13</sup>C NMR (100 MHz, CDCl<sub>3</sub>, 298 K): δ = 157.7, 150.8, 139.0, 132.6, 129.5, 122.4, 121.0, 114.4, 69.3, 61.2, 53.6, 52.5, 34.8, 31.5. HRMS (ESI) *m/z*: [M+H]<sup>+</sup> calcd for C<sub>24</sub>H<sub>36</sub>NO<sub>2</sub>, 370.2746; found, 370.2744.

### Synthesis of the compound 7

To the solution of amine **6** (1 g, 2.71 mmol) in dry DCM (50 mL) was added di-tert-butylidicarbonate (1.18 g, 5.42 mmol) and the mixture was stirred for 5 h at room temperature. The residue was washed with water, dried over Na<sub>2</sub>SO<sub>4</sub> and evaporated in vacuo to give a crude product, which was purified by column chromatography (SiO<sub>2</sub>, CH<sub>2</sub>Cl<sub>2</sub>/MeOH = 100/1) to give product **7** (1.08 g, 85 %) as a colorless oil. <sup>1</sup>H NMR (CDCl<sub>3</sub>, 400 MHz, 298 K): δ = 7.31 (t, *J* = 1.6 Hz, 1H), 7.18 (d, *J* = 7.4 Hz, 1H), 7.08 (m, 3H), 6.87 (d, *J* = 8.5 Hz, 2H), 4.35 (m, 4H), 4.07 (m, 2H), 3.96 (m, 2H), 1.50 (s, 9H), 1.31 (s, 18H). <sup>13</sup>C NMR (100 MHz, CDCl<sub>3</sub>, 298 K): δ = 156.0, 150.8, 121.1, 114.5, 79.8, 69.2, 61.4, 60.2, 34.7, 34.3, 31.4, 31.3, 28.51, 24.6, 22.3, 14.2, 13.9. HRMS (ESI) *m/z*: [M+H]<sup>+</sup> calcd for C<sub>29</sub>H<sub>44</sub>NO<sub>4</sub>, 470.3270; found, 470.3272.

### Synthesis of the compound 8

To the solution of compound **7** (1.08 g, 2.30 mmol) in dry DCM (50 mL) was added 4-toluene sulfonyl chloride (0.88 g, 4.65 mmol) and triethylamine (0.65 ml, 4.65 mmol), then the mixture was stirred for 12 h at room temperature. The residue was washed with water, dried over Na<sub>2</sub>SO<sub>4</sub> and evaporated in vacuo to give a crude product, which was purified by column chromatography (SiO<sub>2</sub>, CH<sub>2</sub>Cl<sub>2</sub>) to give product **8** (1.01 g, 72 %) as a colorless oil. <sup>1</sup>H NMR (CDCl<sub>3</sub>, 400 MHz, 298 K): δ = 7.82 (d, *J* = 8.3 Hz, 2H), 7.38-7.30 (m, 3H), 7.14 (d, *J* = 7.2 Hz, 1H), 7.04 (m, 3H), 6.73 (d, *J* = 8.6 Hz, 2H), 4.36 (m, 4H), 4.27 (m, 2H), 4.18-4.10 (m, 2H), 2.44 (s, 3H), 1.50 (s, 9H), 1.33 (s, 18H). <sup>13</sup>C NMR (100 MHz, CDCl<sub>3</sub>, 298 K): δ = 157.2, 156.0, 150.8, 145.0, 132.8, 129.9, 129.4, 128.8, 128.0, 121.9, 121.1, 114.5, 79.8, 68.2, 65.5, 34.8, 31.5, 29.7, 28.5, 21.7. HRMS (ESI) *m/z*: [M+H]<sup>+</sup> calcd for C<sub>36</sub>H<sub>50</sub>NO<sub>6</sub>S, 624.3359; found, 624.3355.

### Synthesis of the compound 9

A mixture of compound **8** (1 g, 1.65 mmol) and sodium azide (0.54 g, 8.25 mmol) in dry DMF (50 mL) was stirred at 80 °C for 16 h under argon atmosphere. After the reaction mixture had been cooled to room temperature, the solution was evaporated under reduced pressure. The residue was purified via column chromatography (SiO<sub>2</sub>, CH<sub>2</sub>Cl<sub>2</sub>) to give **9** (0.69 g, 85%) as a colorless oil. <sup>1</sup>H NMR (CDCl<sub>3</sub>, 400 MHz, 298 K): δ = 7.31 (t, *J* = 1.6 Hz, 1H), 7.18 (d, *J* = 7.4 Hz, 1H), 7.07 (m, 3H), 6.87 (d, *J* = 8.5 Hz, 2H), 4.4-4.27 (m, 4H), 4.18-4.12 (m, 2H), 3.59 (m, 2H), 1.50 (s, 9H), 1.31 (s, 18H). <sup>13</sup>C NMR (100 MHz, CDCl<sub>3</sub>, 298 K): δ = 156.4, 154.9, 149.7, 136.1, 129.9, 128.4, 127.8, 121.2, 120.8, 120.0, 113.5, 78.7, 65.9, 49.1, 33.7, 30.4, 27.4. HRMS (ESI) *m/z*: [M+H]<sup>+</sup> calcd for C<sub>29</sub>H<sub>43</sub>N<sub>4</sub>O<sub>3</sub>, 495.3335; found, 495.3339.

### Synthesis of the compound 10

TFA (0.8 mL, 10.4 mmol) was added to a solution of product **9** (0.5 g, 1.01 mmol) in dichloromethane (10 mL) and the mixture was stirred for 10 h. A saturated aqueous solution of NH<sub>4</sub>PF<sub>6</sub> (20 mL) was added to the reaction mixture for 4 h. The organic layer was separated and evaporated under reduced pressure to get the yellow solid, which was dissolved in MeOH (10 mL)

and added 20 mL saturated aqueous solution of  $\text{NH}_4\text{PF}_6$ . After stirring for 5 h, the mixture was diluted with  $\text{CH}_2\text{Cl}_2$  (10 mL), the organic layer was separated and evaporated under reduced pressure to get the crude product, which was purified by column chromatography ( $\text{SiO}_2$ ,  $\text{CH}_2\text{Cl}_2/\text{MeOH} = 50/1$ ) to afford product **10** (0.41 g, 75 %) as a faint yellow solid.  $^1\text{H}$  NMR ( $\text{CDCl}_3$ , 400 MHz, 298 K):  $\delta = 7.45$  (t,  $J = 1.6$  Hz, 1H), 7.26 (m, 2H), 7.17 (d,  $J = 1.6$  Hz, 2H), 6.92 (d,  $J = 8.7$  Hz, 2H), 4.14-4.08 (m, 2H), 4.03 (s, 2H), 3.99 (s, 2H), 3.58 (t,  $J = 4.9$  Hz, 2H), 1.32 (s, 18H).  $^{13}\text{C}$  NMR (100 MHz,  $\text{CDCl}_3$ , 298 K):  $\delta = 159.1$ , 152.2, 131.2, 130.1, 123.7, 115.2, 66.7, 51.7, 50.5, 50.6, 34.9, 31.3, 29.7. HRMS (ESI)  $m/z$ :  $[\text{M-PF}_6]^+$  calcd for  $\text{C}_{24}\text{H}_{35}\text{N}_4\text{O}_2$ , 395.2811; found, 395.2813.

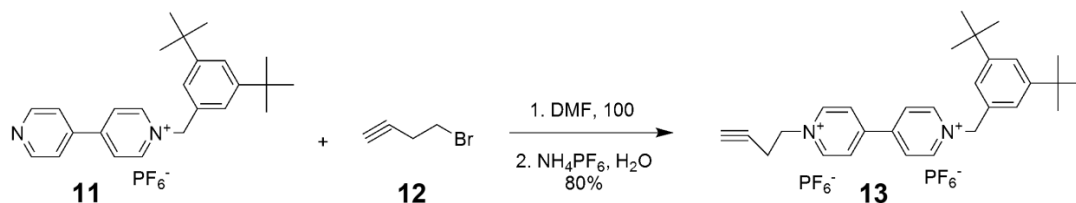

Scheme S2 Synthetic strategy to prepare compound **13**

### Synthesis of the compound **13**

The pyridinium salt **11** (0.3 g, 0.53 mmol) was added to a  $\text{CH}_3\text{CN}$  solution (10 mL) of 4-bromo-1-butyne **12** (0.15 g, 1.1 mmol); this mixture was then stirred at 100 °C for 24 h. Saturated aqueous  $\text{NH}_4\text{PF}_6$  (20 mL) was added to the solution; the organic solvent was evaporated and the residue was extracted with  $\text{CH}_2\text{Cl}_2$  ( $2 \times 20$  mL). The organic phases were combined, dried ( $\text{Na}_2\text{SO}_4$ ), and concentrated to afford a crude product, which was purified by column chromatography ( $\text{SiO}_2$ ,  $\text{CH}_2\text{Cl}_2/\text{MeOH} = 25/1$ ) to give compound **13** as a light-yellow solid (0.29 g, 80 %).  $^1\text{H}$  NMR ( $\text{CD}_3\text{SOCD}_3$ , 400 MHz, 298 K):  $\delta = 9.59$  (d,  $J = 6.2$  Hz, 2H), 9.39 (d,  $J = 6.0$  Hz, 2H), 8.79 (t,  $J = 6.3$  Hz, 4H), 7.55 (s, 2H), 7.47 (s, 1H), 5.87 (s, 2H), 4.84 (t,  $J = 6.2$  Hz, 1H), 3.11 (s, 1H), 3.04 (s, 2H), 1.29 (s, 18H).  $^{13}\text{C}$  NMR (100 MHz,  $\text{CD}_3\text{SOCD}_3$ , 298 K)  $\delta = 151.5$ , 149.1, 148.8, 145.9, 145.4, 133.3, 128.0, 127.2, 126.4, 125.4, 123.3, 123.1, 79.0, 75.3, 64.1, 58.7, 34.7, 31.1, 20.3. HRMS (ESI)  $m/z$ :  $[\text{M-PF}_6]^+$  calcd for  $\text{C}_{29}\text{H}_{36}\text{N}_2\text{PF}_6$ , 557.2520; found, 557.2518.

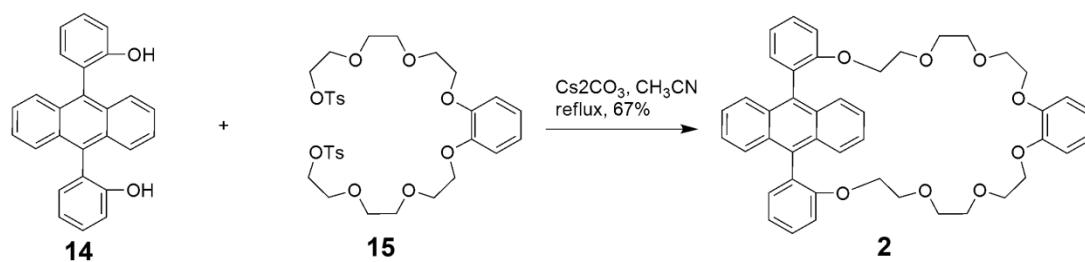

Scheme S3 Synthetic strategy to prepare compound **2**

### Synthesis of the compound **2**

A solution of diphenol **14** (1.2 g, 3.31 mmol), compound **15** (2.2 g, 3.31 mmol), and  $\text{Cs}_2\text{CO}_3$  (3.9 g, 12 mmol) in  $\text{CH}_3\text{CN}$  (100 mL) was heated to reflux under  $\text{N}_2$  for 24 h. Then the organic solvent was evaporated and the residue was extracted with  $\text{CH}_2\text{Cl}_2$  ( $3 \times 50$  mL), and the combined organic layer was washed with brine ( $3 \times 50$  mL), dried over  $\text{Na}_2\text{SO}_4$  and evaporated in vacuo to obtain oily liquid, which was purified by column chromatography ( $\text{SiO}_2$ ,  $\text{CH}_2\text{Cl}_2/\text{MeOH} = 30/1$ ) to give product **2** (1.56 g, 67 %) as a blue solid.  $^1\text{H}$  NMR ( $\text{CDCl}_3$ , 400 MHz, 298 K):  $\delta = 7.64$  (dd,  $J = 6.7$ , 3.2 Hz, 4H), 7.52 (t,  $J = 7.8$  Hz, 2H), 7.33-7.28 (m, 6H), 7.22-7.12 (m, 4H), 6.88-6.78 (m, 4H),

4.01 (t,  $J = 4.6$  Hz, 8H), 3.69-3.65 (m, 4H), 3.37 (t,  $J = 5.1$  Hz, 4H), 3.25-3.20 (m, 4H), 3.06-3.02 (m, 4H).  $^{13}\text{C}$  NMR (100 MHz,  $\text{CDCl}_3$ , 298 K):  $\delta = 157.3, 148.8, 133.7, 133.0, 130.0, 129.3, 127.9, 126.9, 124.7, 121.2, 121.1, 113.7, 112.7, 70.8, 70.3, 69.4, 68.9, 68.8, 68.7$ . HRMS (ESI)  $m/z$ :  $[\text{M}+\text{Na}]^+$  calcd for  $\text{C}_{44}\text{H}_{44}\text{O}_8\text{Na}$ , 723.2934; found, 723.2933.

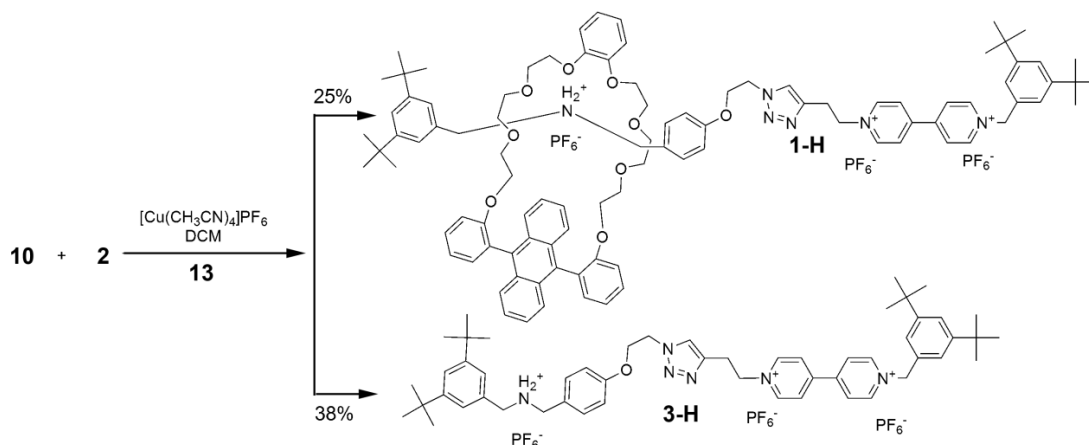

Scheme S4 Synthetic strategy to prepare compound **1-H** and **3-H**

#### Synthesis of the compound **3-H** and **1-H**

A mixture of azide **10** (0.16 g, 0.29 mmol) and crown ether **2** (0.21 g, 0.29 mmol) was stirred in dry  $\text{CH}_2\text{Cl}_2$  (5 mL) at room temperature for 1 h. After alkyne **13** (0.25 g, 0.35 mmol) and  $\text{Cu}(\text{CH}_3\text{CN})_4\text{PF}_6$  (0.024 g, 0.058 mmol) were added to the solution, the mixture was stirred for two days. After removal of the solvent, the residue was first purified via column chromatography ( $\text{SiO}_2$ ,  $\text{CH}_2\text{Cl}_2/\text{MeOH} = 100/1$ ) to give compound **1-H** (0.14 g, 25 %) as a light orange powder.  $^1\text{H}$  NMR ( $\text{CD}_3\text{COCD}_3$ , 400 MHz, 298 K):  $\delta = 9.29$  (d,  $J = 6.1$  Hz, 2H), 9.07 (d,  $J = 6.0$  Hz, 2H), 8.43 (m, 5.8 Hz, 4H), 7.81 (s, 1H), 7.68-7.57 (m, 7H), 7.55 (d,  $J = 1.4$  Hz, 2H), 7.51 (m, 2.9 Hz, 3H), 7.42 (d,  $J = 8.4$  Hz, 2H), 7.37 (m, 2H), 7.32 (d,  $J = 1.4$  Hz, 2H), 7.26-7.15 (m, 8H), 6.71 (m, 6H), 5.96 (s, 2H), 5.05 (t,  $J = 6.4$  Hz, 2H), 4.74 (t,  $J = 5.0$  Hz, 2H), 4.29 (t,  $J = 5.0$  Hz, 2H), 4.05 (m, 12H), 3.66-3.31 (m, 18H), 1.32 (s, 18H), 1.25 (s, 18H).  $^{13}\text{C}$  NMR (100 MHz,  $\text{CD}_3\text{COCD}_3$ , 298 K)  $\delta = 158.86, 157.06, 152.42, 151.47, 149.84, 147.37, 145.37, 134.19, 133.25, 132.39, 131.55, 130.08, 129.74, 127.70, 127.28, 127.00, 126.96, 126.71, 125.28, 125.16, 124.14, 123.81, 123.76, 123.38, 121.55, 121.32, 114.47, 114.11, 113.75, 112.80, 70.15, 69.35, 69.08, 68.16, 67.76, 66.34, 65.41, 60.74, 49.32, 34.76, 34.62, 33.57, 31.73, 30.73, 26.73, 22.42, 13.45$ . HRMS (ESI)  $m/z$ :  $[\text{M}-2\text{PF}_6]^{2+}$  calcd for  $\text{C}_{97}\text{H}_{115}\text{N}_6\text{O}_9\text{PF}_6$ , 826.9201; found, 826.9189;  $[\text{M}-3\text{PF}_6]^{3+}$  calcd for  $\text{C}_{97}\text{H}_{115}\text{N}_6\text{O}_9$ , 502.9586; found, 502.9527. Then purified via column chromatography ( $\text{SiO}_2$ ,  $\text{CH}_2\text{Cl}_2/\text{MeOH} = 20/1$ ) to give compound **3-H** (0.13 g, 38 %) as a light orange solid.  $^1\text{H}$  NMR ( $\text{CD}_3\text{SOCD}_3$ , 400 MHz, 298 K):  $\delta = 9.57$  (d,  $J = 6.9$  Hz, 2H), 9.37 (d,  $J = 6.9$  Hz, 2H), 9.04 (s, 2H), 8.75 (m, 4H), 8.07 (s, 2H), 7.54 (d,  $J = 1.6$  Hz, 2H), 7.45-7.39 (m, 4H), 7.29 (d,  $J = 1.6$  Hz, 2H), 7.00 (d,  $J = 8.7$  Hz, 2H), 5.86 (s, 2H), 5.00 (t,  $J = 7.1$  Hz, 2H), 4.74 (t,  $J = 4.9$  Hz, 2H), 4.40 (t,  $J = 4.9$  Hz, 2H), 4.17-4.08 (m, 4H), 3.44 (t,  $J = 7.2$  Hz, 2H), 1.29 (s, 36H).  $^{13}\text{C}$  NMR (100 MHz,  $\text{CD}_3\text{SOCD}_3$ , 298 K)  $\delta = 158.2, 151.5, 150.8, 148.8, 145.9, 145.4, 141.7, 133.3, 131.6, 131.1, 127.1, 126.3, 124.1, 123.7, 123.6, 123.6, 123.2, 123.1, 122.5, 114.6, 50.3, 49.7, 48.9, 34.7, 34.5, 31.1, 31.1, 26.5$ . HRMS (ESI)  $m/z$ :  $[\text{M}-\text{PF}_6]^+$  calcd for  $\text{C}_{53}\text{H}_{71}\text{N}_6\text{P}_2\text{F}_{12}$ , 1097.4973; found, 1097.4977.

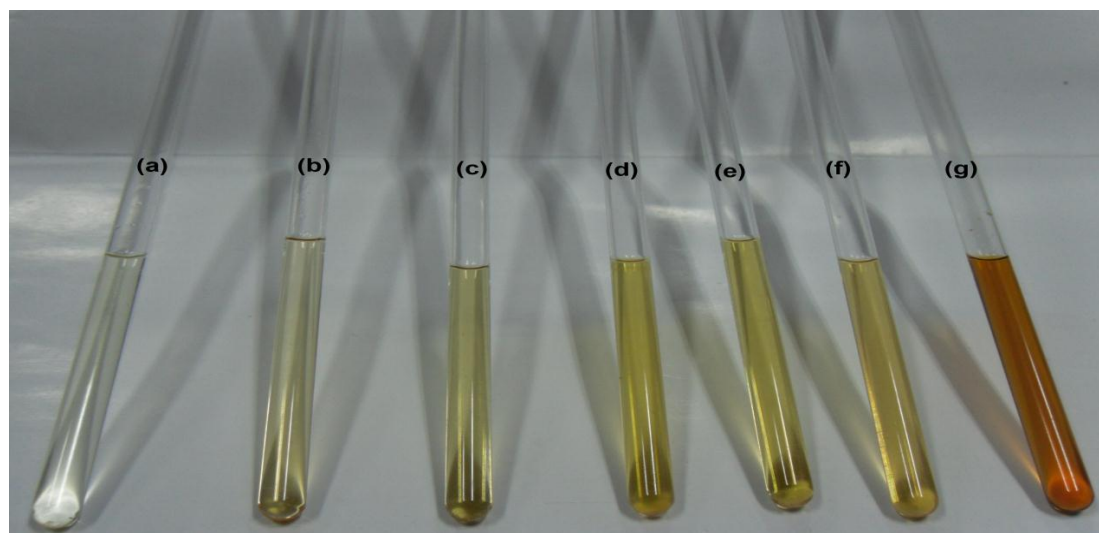

Fig. S1 Photograph of (a) [2]rotaxane **1-H** in  $\text{CD}_3\text{COCD}_3$ , (b) [2]rotaxane **1-H** in  $\text{CD}_3\text{SOCD}_3$ , (c) the mixture obtained after addition of 2 equiv  $\text{Bu}_3\text{N}$  to sample a, (d) the mixture obtained after addition of 3.5 equiv TBAF to sample a, (e) the mixture obtained after addition of 3.5 equiv TBACl to sample a, (f) the mixture obtained after addition of 3.5 equiv TBABr to sample a, and (g) the mixture obtained after addition of 2 equiv TBAI to sample a.

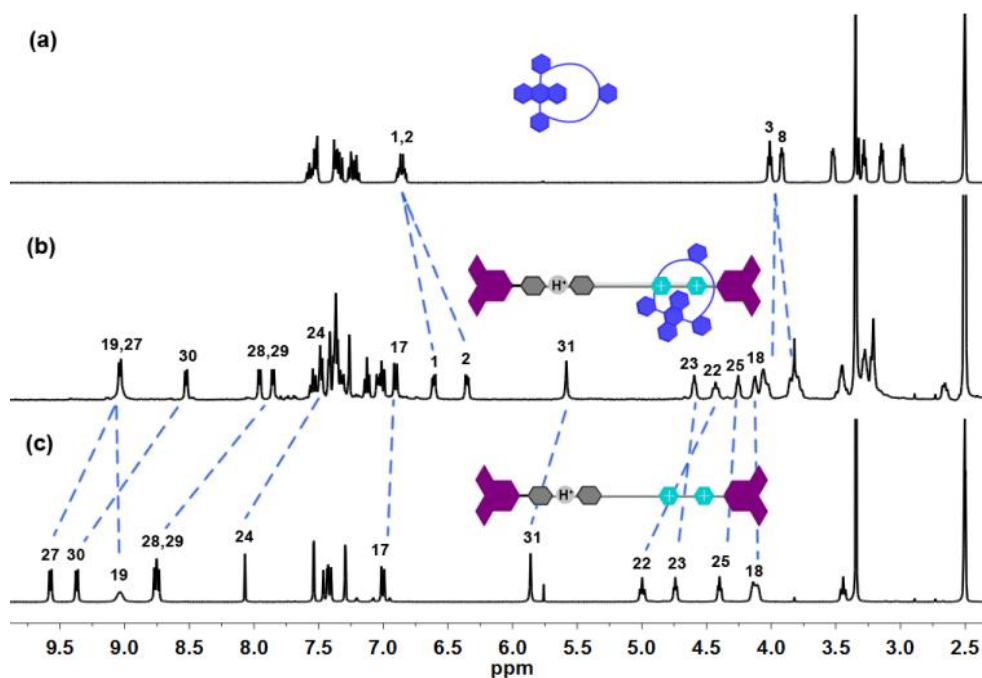

Fig. S2 Partial  $^1\text{H}$  NMR spectra (400 MHz,  $\text{DMSO-d}_6$ , 298 K) of (a) macrocycle **2**, (b) [2]rotaxane **1-H**, (c) thread component **3-H**.

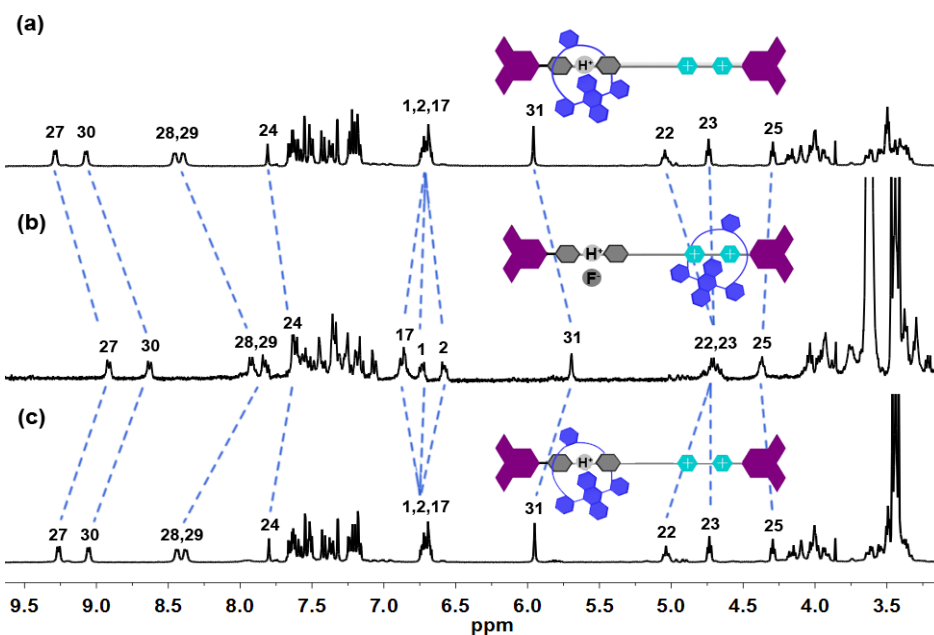

Fig. S3 Partial  $^1\text{H}$  NMR spectra (400 MHz,  $\text{CD}_3\text{COCD}_3$ , 298 K) of (a) [2]rotaxane **1-H**, (b) the solution obtained after adding 3.5 equiv of TBAF to the solution of a, and (c) the solution obtained after adding 4 equiv of  $\text{Ca}(\text{PF}_6)_2$  to the solution of b.

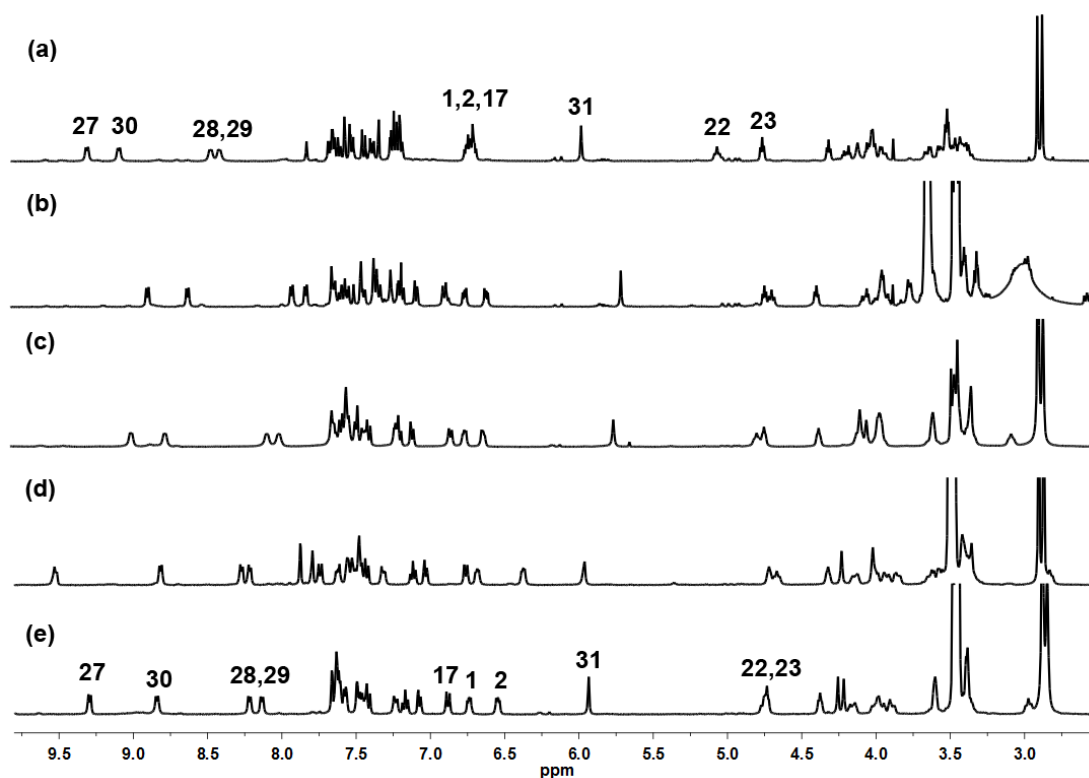

Fig. S4 Partial  $^1\text{H}$  NMR spectra ( $\text{CD}_3\text{COCD}_3$ , 400 MHz, 298 K) of (a) [2]rotaxane **1-H**, (b) the mixture obtained after addition of 3.5 equiv TBAF to sample a, (c) the mixture obtained after addition of 3.5 equiv TBACl to sample a, (d) the mixture obtained after addition of 3.5 equiv TBABr to sample a, and (e) the mixture obtained after addition of 3.5 equiv TBAI to sample a.

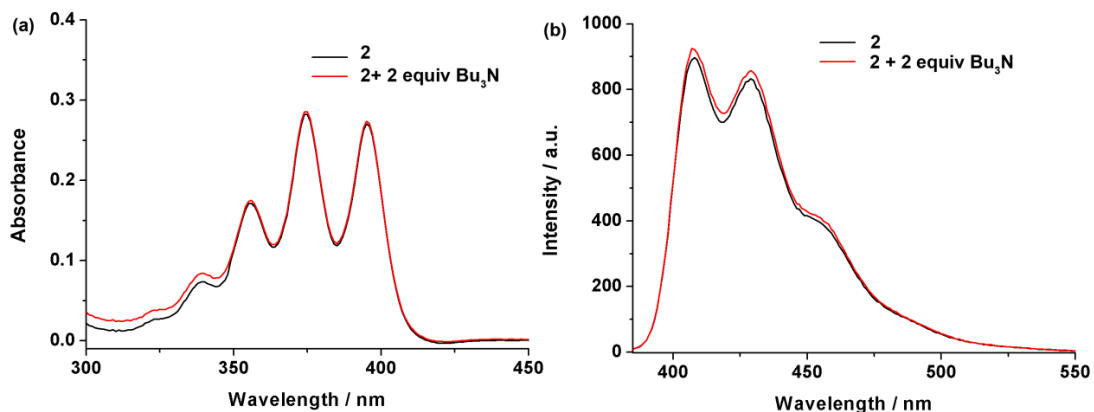

Fig. S5 (a) Absorption and (b) fluorescence spectral changes of **2** in CH<sub>2</sub>Cl<sub>2</sub> ( $2 \times 10^{-5}$  M) upon addition of 2 equiv of Bu<sub>3</sub>N. Excitation wavelength was 375 nm.

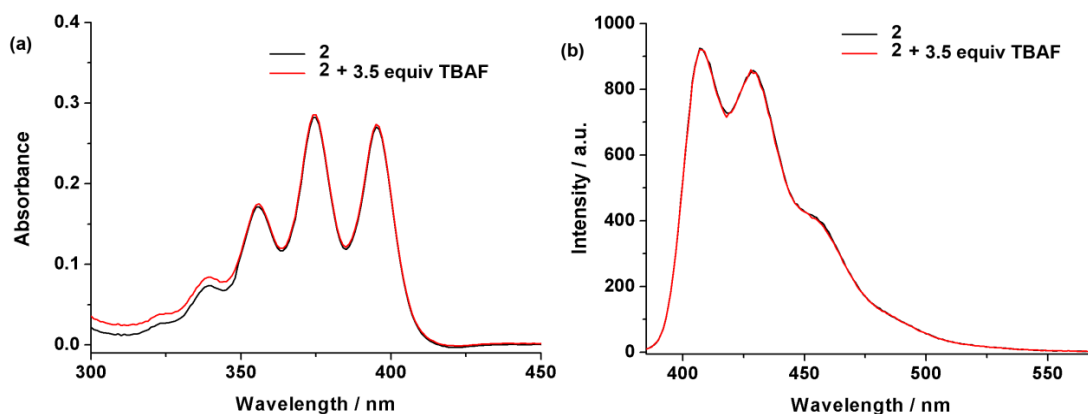

Fig. S6 (a) Absorption and (b) fluorescence spectral changes of **2** in CH<sub>2</sub>Cl<sub>2</sub> ( $2 \times 10^{-5}$  M) upon addition of 3.5 equiv of TBAF. Excitation wavelength was 375 nm.

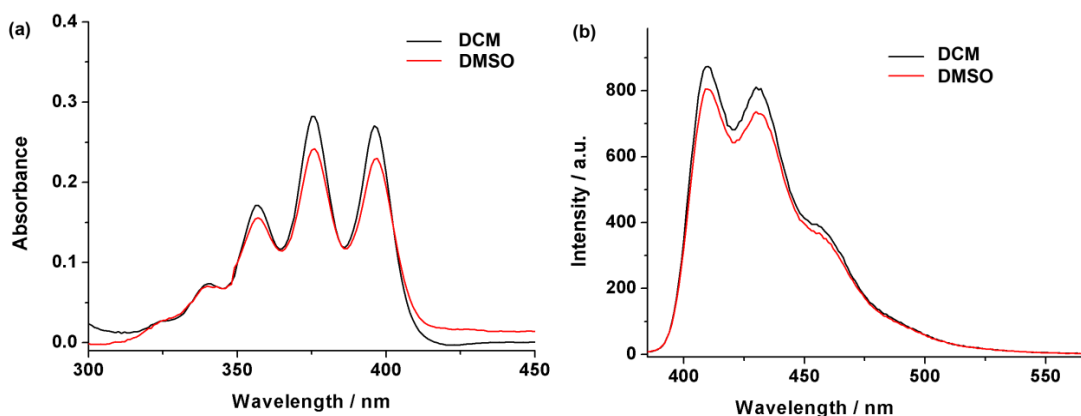

Fig. S7 (a) Absorption and (b) fluorescence spectra of macrocycle **2** ( $2 \times 10^{-5}$  M) in DCM and DMSO. Excitation wavelength was 375 nm.

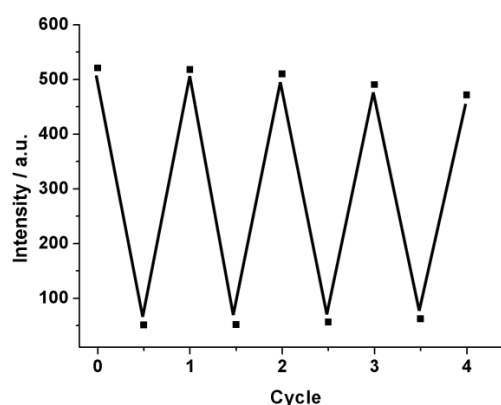

Fig. S8 Fluorescence intensity of **1-H** in CH<sub>2</sub>Cl<sub>2</sub> (2 × 10<sup>-5</sup> M) at 410 nm upon addition of alternate external stimuli (Bu<sub>3</sub>N and TFA) for four cycles. The excitation wavelength was 375 nm.

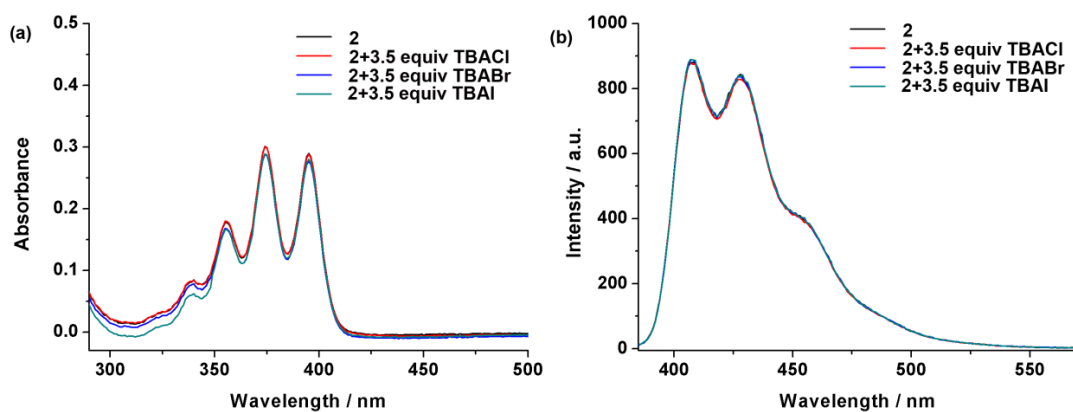

Fig. S9 (a) Absorption and (b) fluorescence spectral changes of **2** in CH<sub>2</sub>Cl<sub>2</sub> (2×10<sup>-5</sup> M) upon addition of 3.5 equiv of TBACl, TBABr, and TBAI. Excitation wavelength was 375 nm.

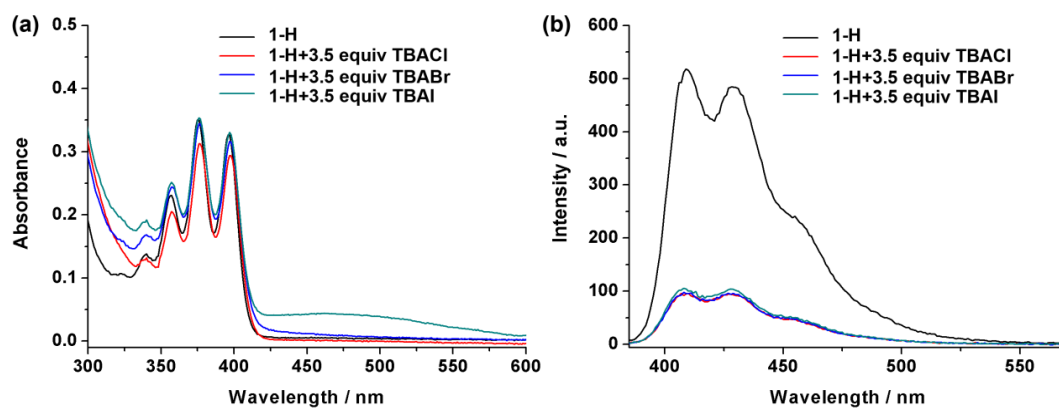

Fig. S10 (a) Absorption and (b) fluorescence spectral changes of **1-H** in CH<sub>2</sub>Cl<sub>2</sub> (2×10<sup>-5</sup> M) upon addition of 3.5 equiv of TBACl, TBABr, and TBAI. Excitation wavelength was 375 nm.



# <sup>1</sup>H NMR, <sup>13</sup>C NMR and Mass Spectra Compound 6

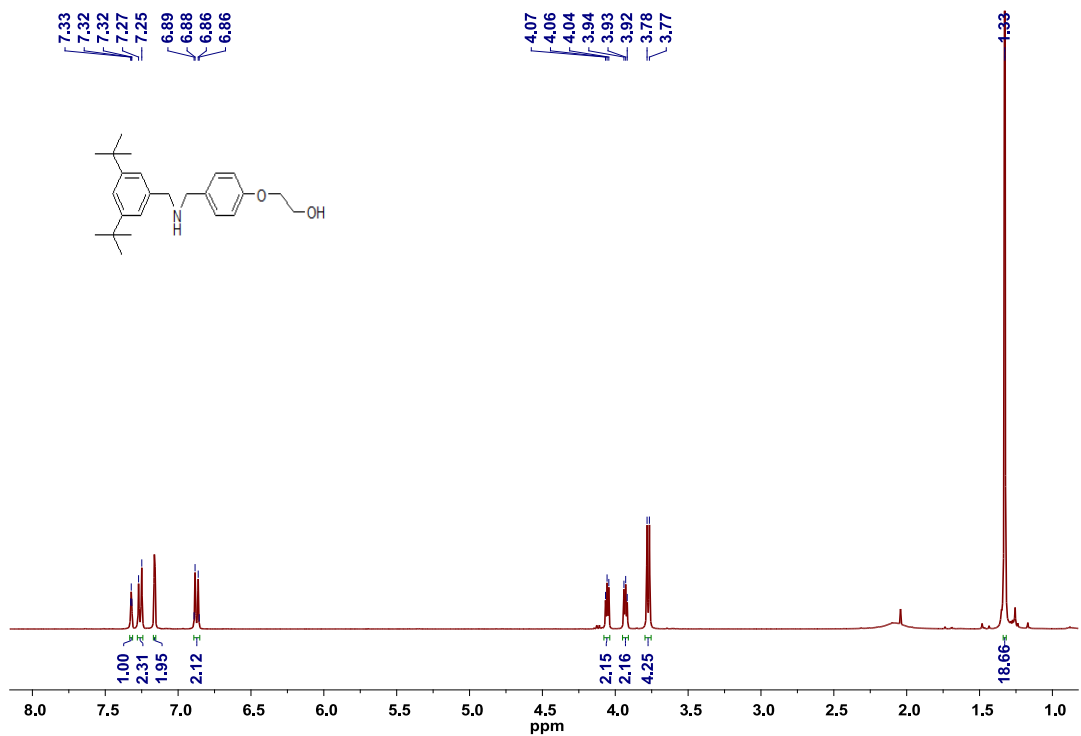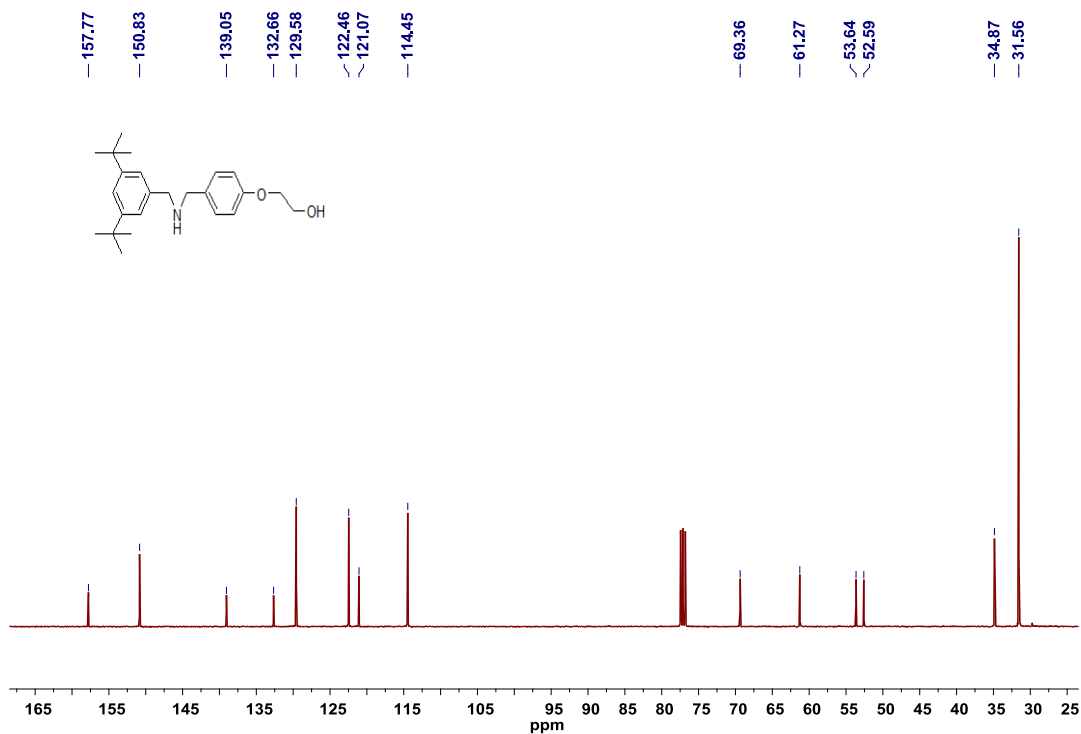

### Single Mass Analysis

Tolerance = 50.0 mDa / DBE: min = -1.5, max = 100.0

Element prediction: Off

Number of isotope peaks used for i-FIT = 2

Monoisotopic Mass, Even Electron Ions

579 formula(e) evaluated with 38 results within limits (up to 1 closest results for each mass)

Elements Used:

C: 0-65 H: 0-120 N: 0-10 O: 0-14

H-TIAN

ECUST institute of Fine Chem

02-Dec-2012

21:45:24

1: TOF MS ES+  
6.00e+003

TH-ZW-9 36 (1.181) Cm (31:40)

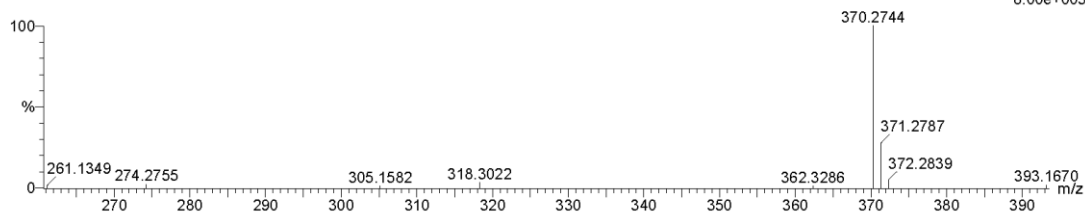

Minimum: -1.5  
Maximum: 50.0 50.0 100.0

| Mass     | Calc. Mass | mDa  | PPM  | DBE | i-FIT | i-FIT (Norm) | Formula      |
|----------|------------|------|------|-----|-------|--------------|--------------|
| 370.2744 | 370.2746   | -0.2 | -0.5 | 7.5 | 7.3   | 0.0          | C24 H36 N O2 |

### Compound 7

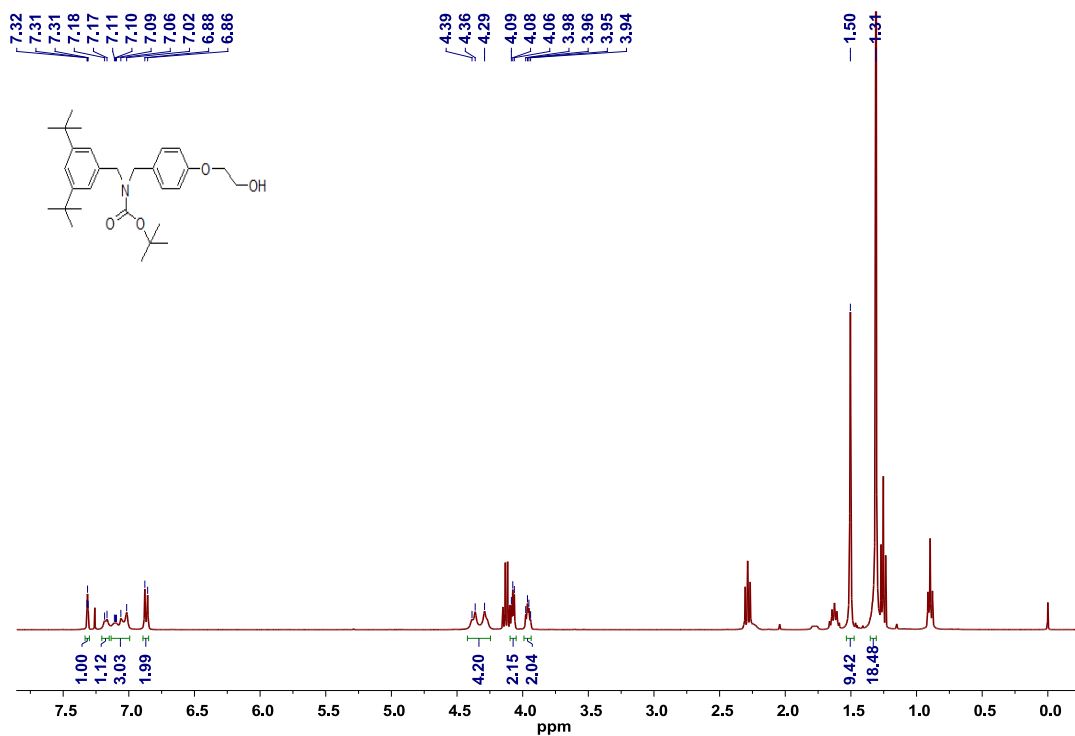

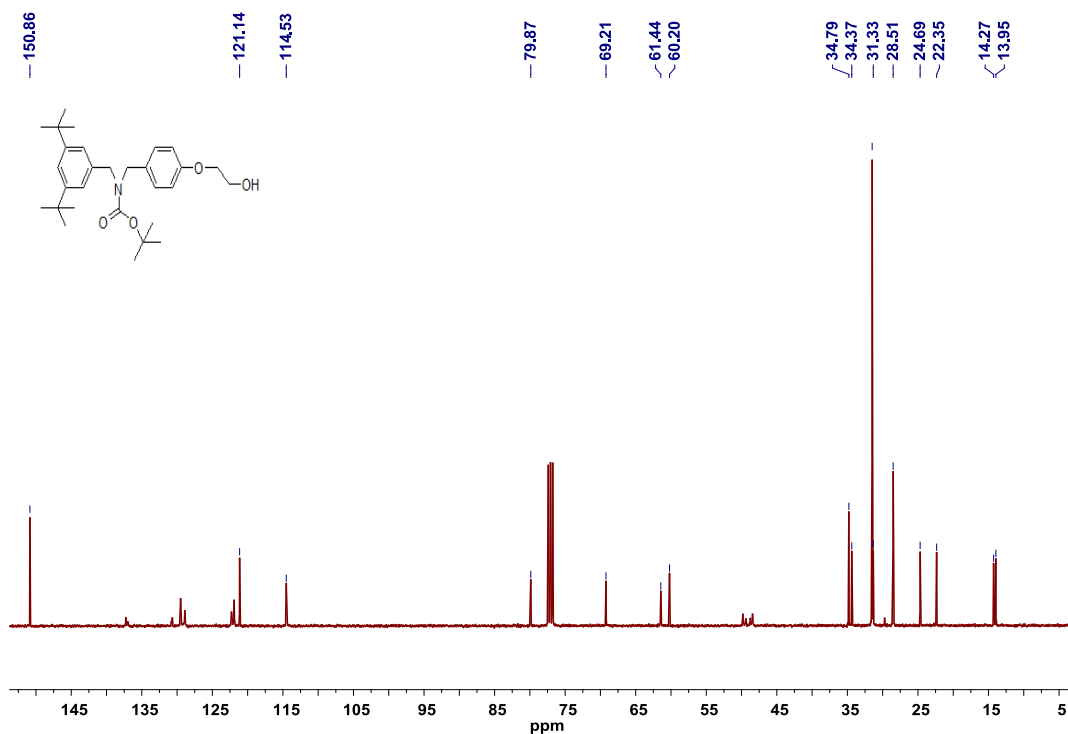

### Single Mass Analysis

Tolerance = 50.0 mDa / DBE: min = -1.5, max = 100.0  
 Element prediction: Off  
 Number of isotope peaks used for i-FIT = 2

Monoisotopic Mass, Even Electron Ions

132 formula(e) evaluated with 15 results within limits (up to 1 closest results for each mass)

Elements Used:

C: 0-35 H: 0-47 N: 0-5 O: 0-5

H-TIAN

ECUST institute of Fine Chem

01-Dec-2012

11:25:48

1: TOF MS ES+

6.60e+003

TH-ZW-10 48 (1.553) Cm (46.48)

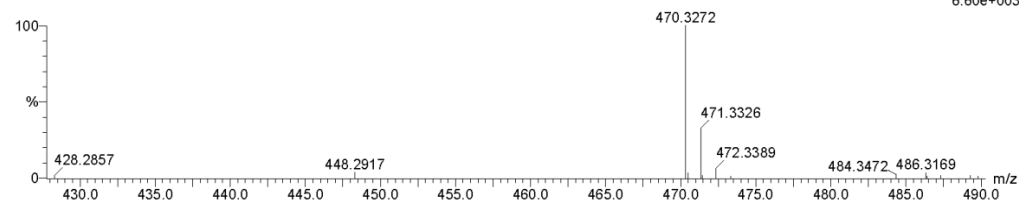

Minimum: 50.0 50.0 -1.5  
 Maximum: 100.0 100.0

| Mass     | Calc. Mass | mDa | PPM | DBE | i-FIT | i-FIT (Norm) | Formula      |
|----------|------------|-----|-----|-----|-------|--------------|--------------|
| 470.3272 | 470.3270   | 0.2 | 0.4 | 8.5 | 29.7  | 0.0          | C29 H44 N O4 |

## Compound 8

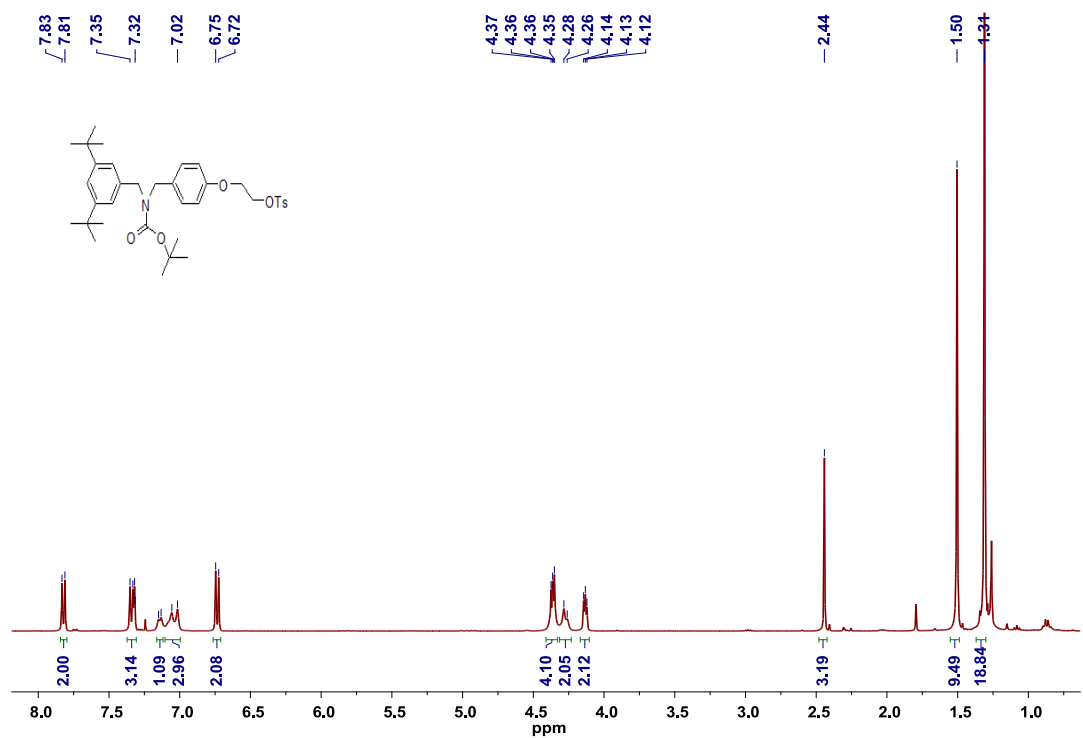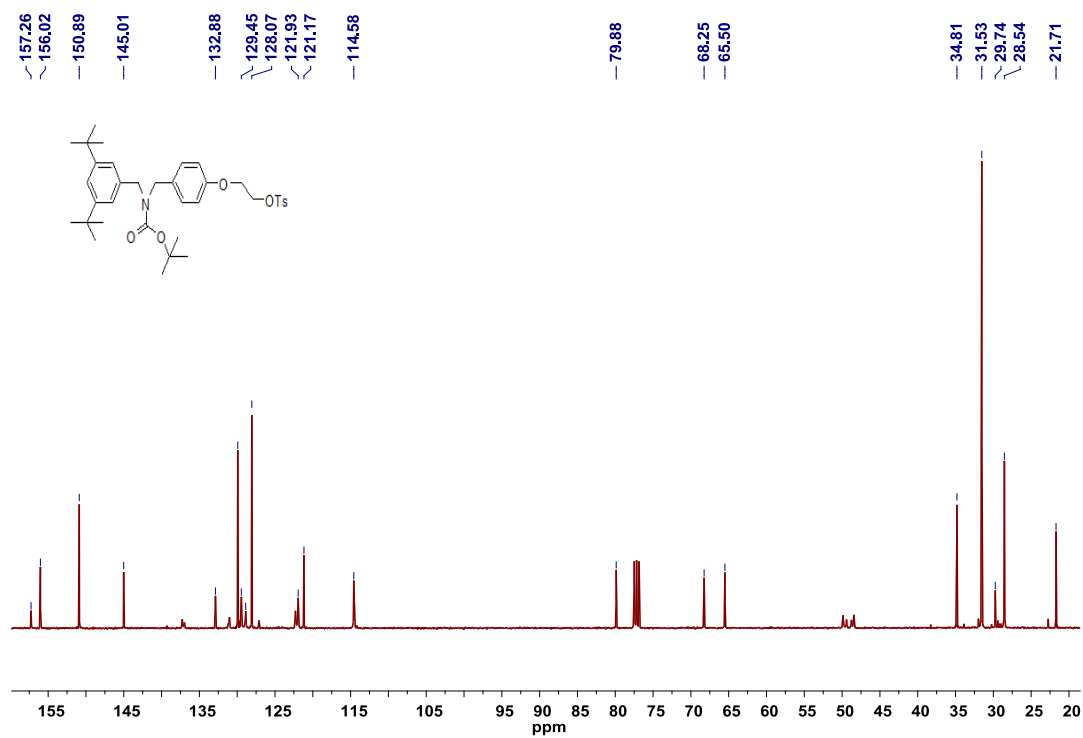

### Single Mass Analysis

Tolerance = 50.0 mDa / DBE: min = -1.5, max = 100.0  
Element prediction: Off  
Number of isotope peaks used for i-FIT = 2

Monoisotopic Mass, Even Electron Ions

1259 formula(e) evaluated with 75 results within limits (up to 1 closest results for each mass)

Elements Used:

C: 0-44 H: 0-80 N: 0-4 O: 0-6 S: 0-5

H-TIAN

ECUST institute of Fine Chem

02-Dec-2012

11:54:52

1: TOF MS ES+

1.03e+003

TH-ZW-11 35 (1.159) Cm (34:35)

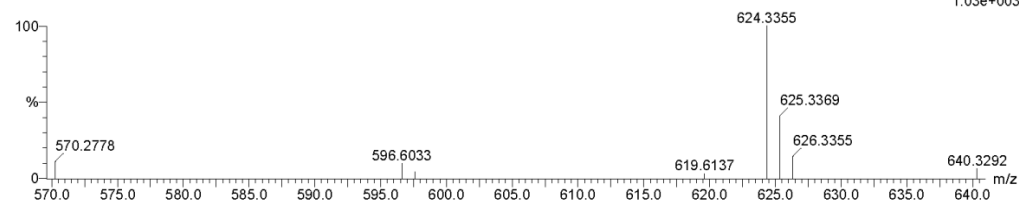

Minimum: 50.0 50.0 -1.5  
Maximum: 100.0 100.0

| Mass     | Calc. Mass | mDa  | PPM  | DBE  | i-FIT | i-FIT (Norm) | Formula        |
|----------|------------|------|------|------|-------|--------------|----------------|
| 624.3355 | 624.3359   | -0.4 | -0.6 | 12.5 | 7.9   | 0.0          | C36 H50 N O6 S |

## Compound 9

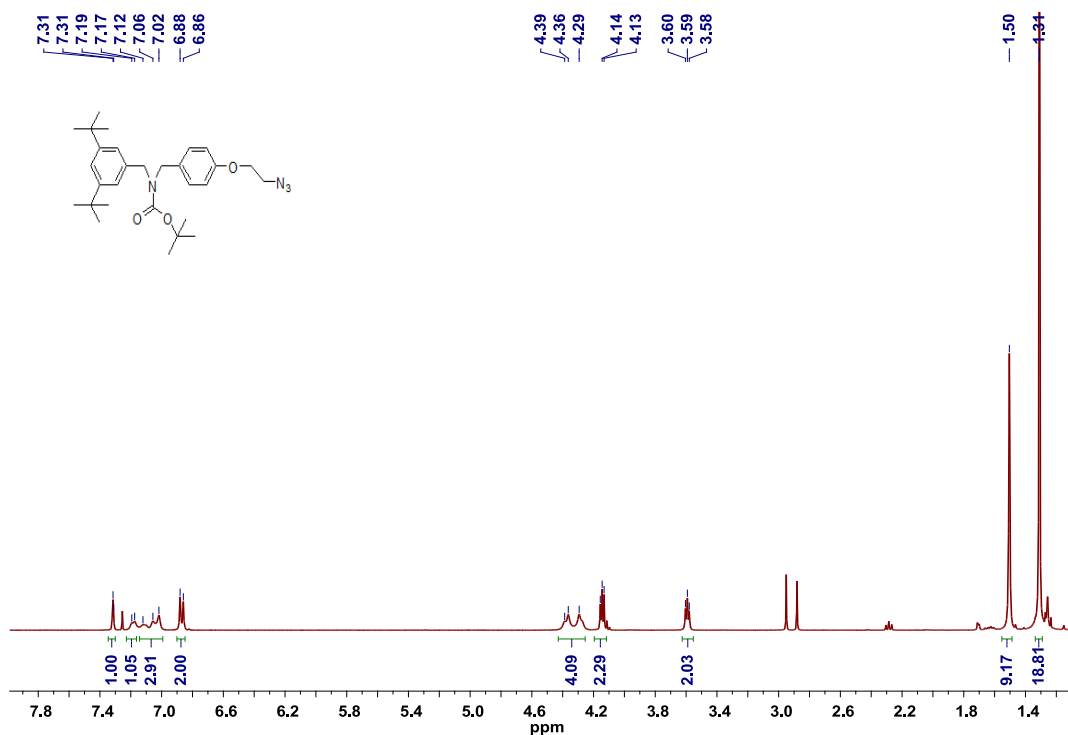

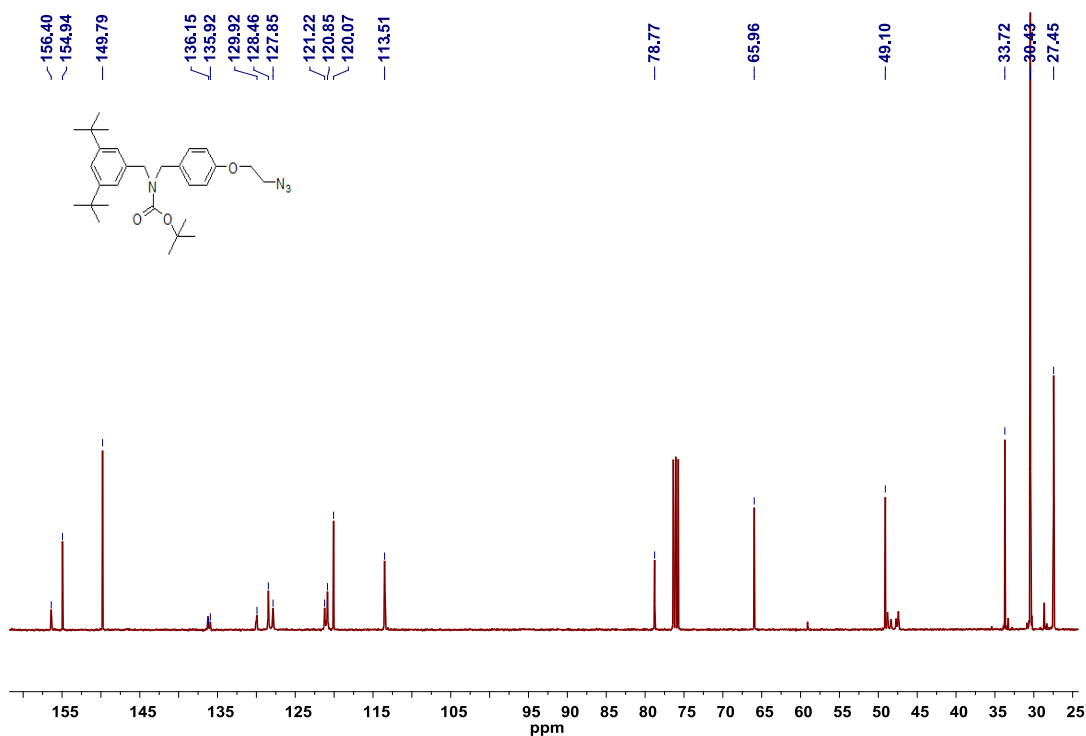

### Single Mass Analysis

Tolerance = 50.0 mDa / DBE: min = -1.5, max = 100.0

Element prediction: Off

Number of isotope peaks used for i-FIT = 2

Monoisotopic Mass, Odd and Even Electron Ions

158 formula(e) evaluated with 27 results within limits (up to 1 closest results for each mass)

Elements Used:

C: 0-40 H: 0-80 N: 0-4 O: 0-4

H-TIAN

ECUST institute of Fine Chem

02-Dec-2012

12:58:05

1: TOF MS ES+

2.19e+003

TH-ZW-12 14 (0.520) Cm (8:14)

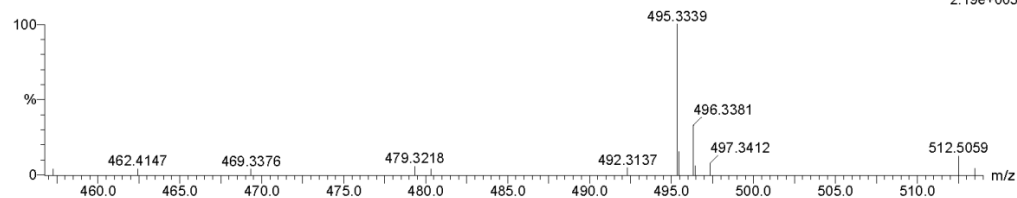

Minimum: -1.5  
 Maximum: 50.0 50.0 100.0

| Mass     | Calc. Mass | mDa | PPM | DBE  | i-FIT | i-FIT (Norm) | Formula                                                       |
|----------|------------|-----|-----|------|-------|--------------|---------------------------------------------------------------|
| 495.3339 | 495.3335   | 0.4 | 0.8 | 10.5 | 29.1  | 0.0          | C <sub>29</sub> H <sub>43</sub> N <sub>4</sub> O <sub>3</sub> |

## Compound 10

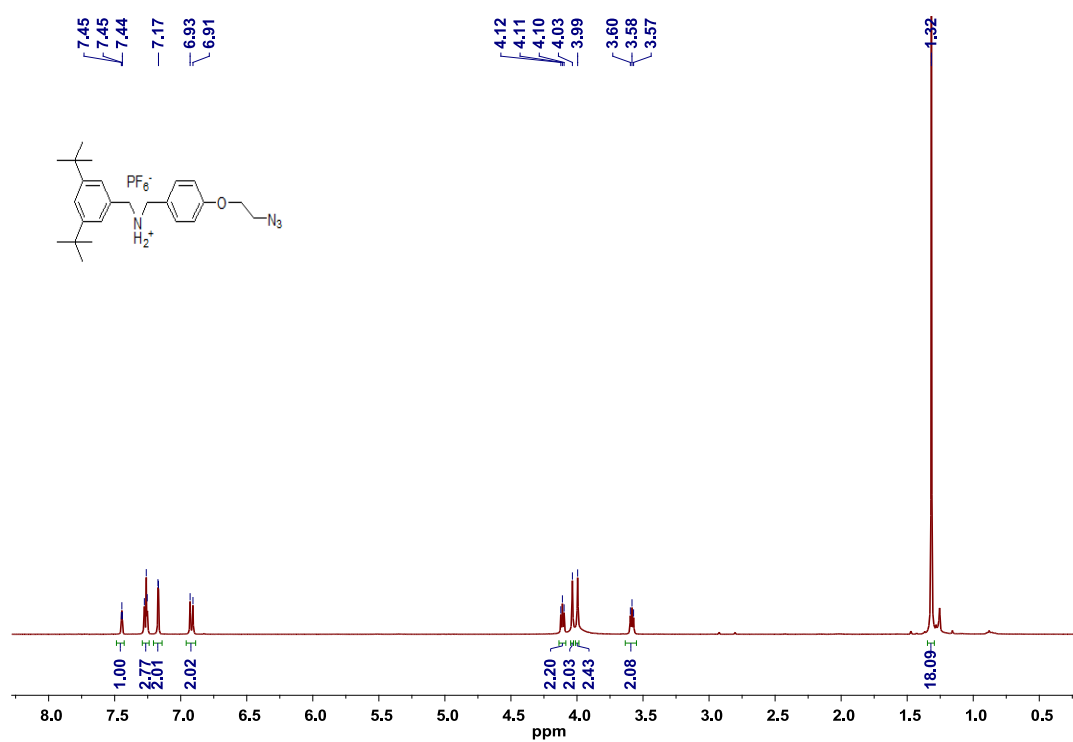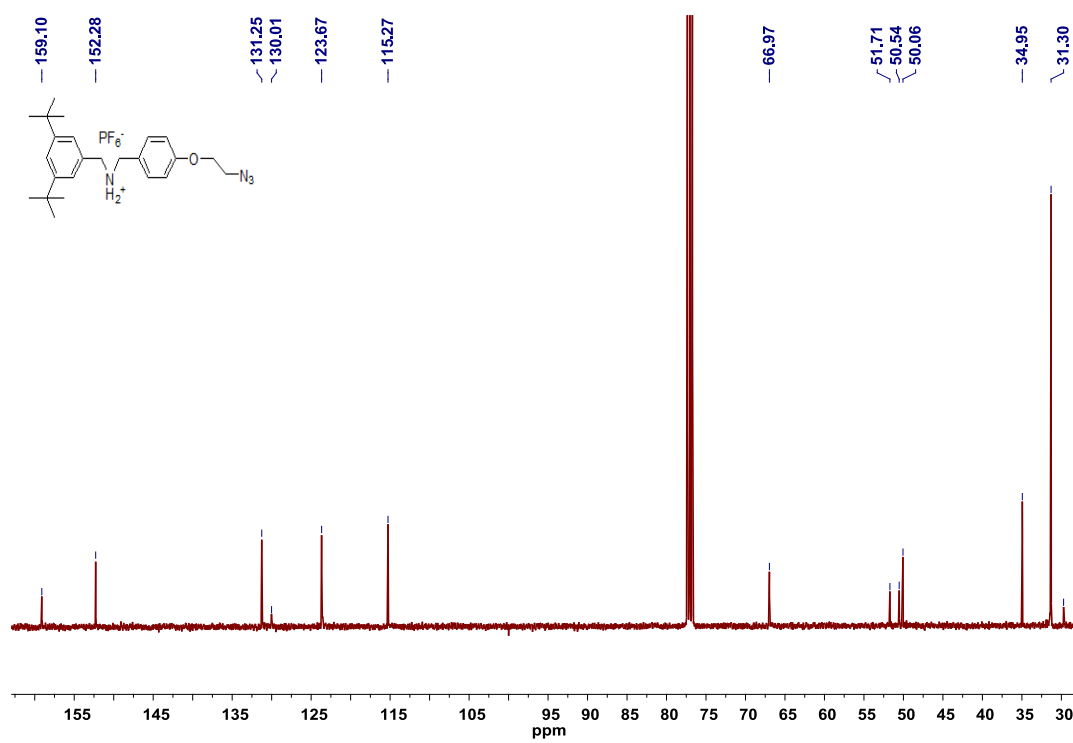

### Single Mass Analysis

Tolerance = 50.0 mDa / DBE: min = -1.5, max = 100.0

Element prediction: Off

Number of isotope peaks used for i-FIT = 2

Monoisotopic Mass, Even Electron Ions

13 formula(e) evaluated with 1 results within limits (up to 1 closest results for each mass)

Elements Used:

C: 0-24 H: 0-80 N: 0-4 O: 0-1

H-TIAN

ECUST institute of Fine Chem

02-Dec-2012

12:44:45

1: TOF MS ES+

4.30e+003

TH-ZW-13 6 (0.275) Cm (6:10)

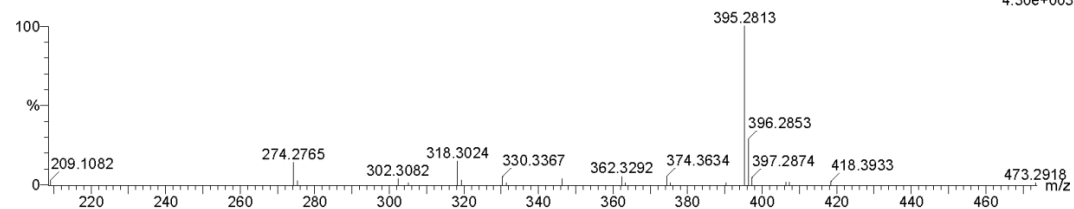

Minimum: -1.5  
Maximum: 100.0

| Mass     | Calc. Mass | mDa | PPM | DBE | i-FIT | i-FIT (Norm) | Formula      |
|----------|------------|-----|-----|-----|-------|--------------|--------------|
| 395.2813 | 395.2811   | 0.2 | 0.5 | 9.5 | 7.1   | 0.0          | C24 H35 N4 O |

## Compound 13

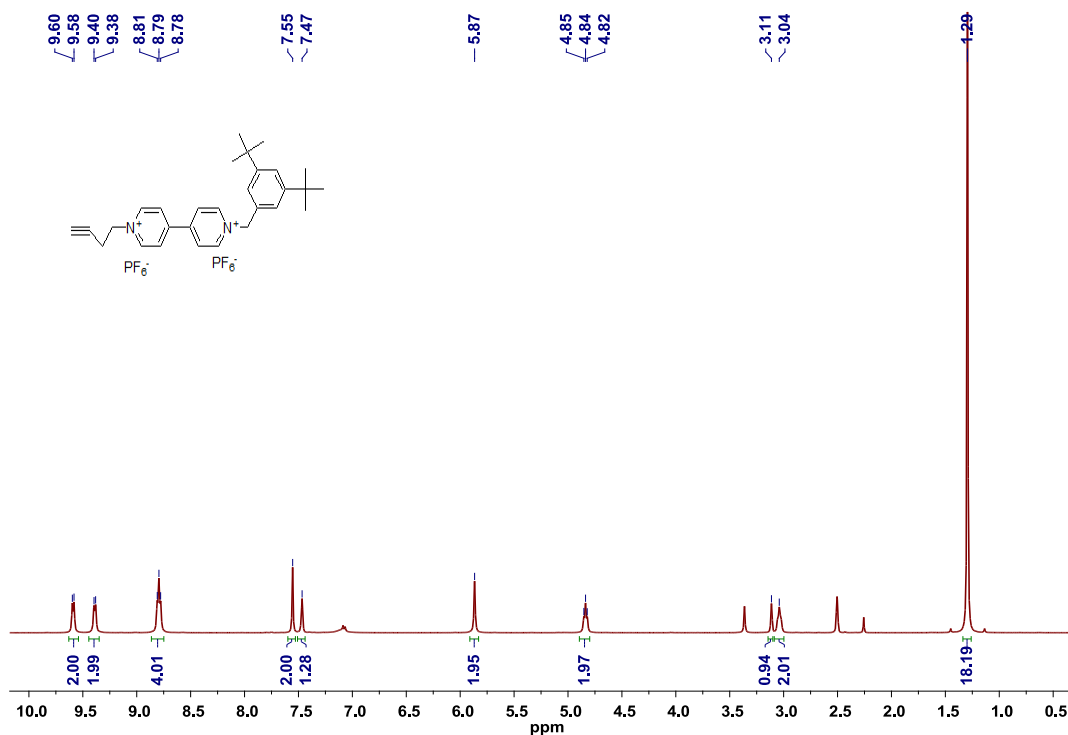



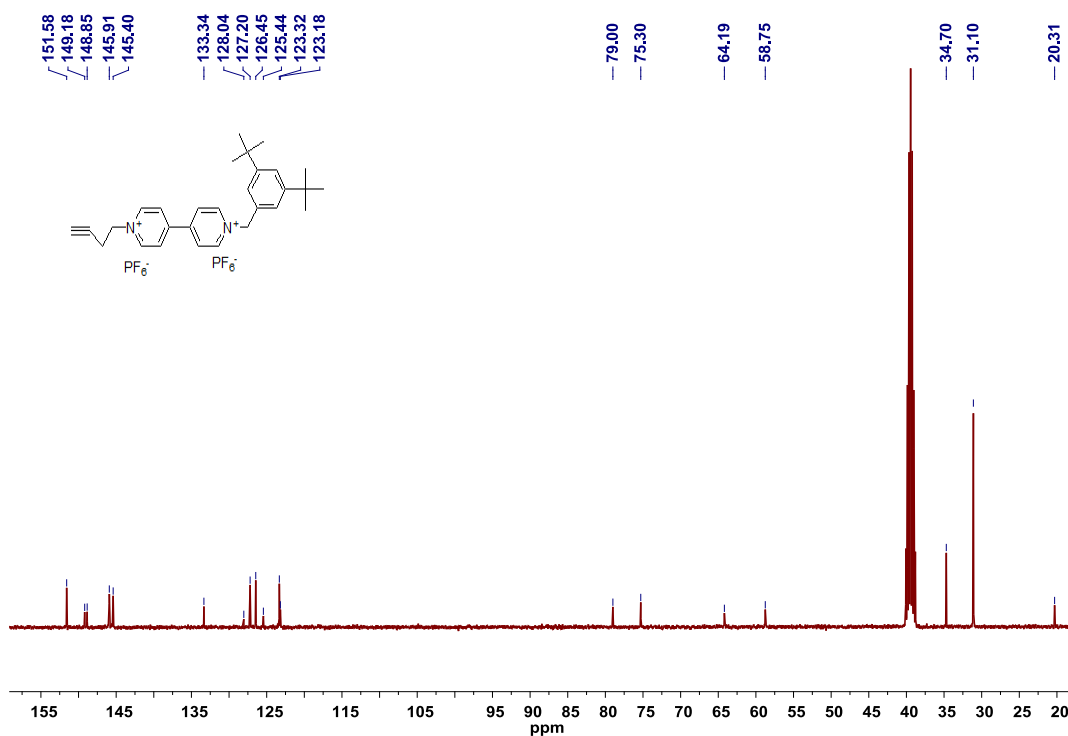

### Single Mass Analysis

Tolerance = 50.0 mDa / DBE: min = -1.5, max = 100.0

Element prediction: Off

Number of isotope peaks used for i-FIT = 2

Monoisotopic Mass, Even Electron Ions

287 formula(e) evaluated with 23 results within limits (up to 1 closest results for each mass)

Elements Used:

C: 0-29 H: 0-80 N: 0-6 F: 0-6 P: 0-2

H-TIAN

ECUST institute of Fine Chem

02-Dec-2012

12:23:14

1: TOF MS ES+

2.33e+003

TH-ZW-1 22 (0.766) Cm (20:26)

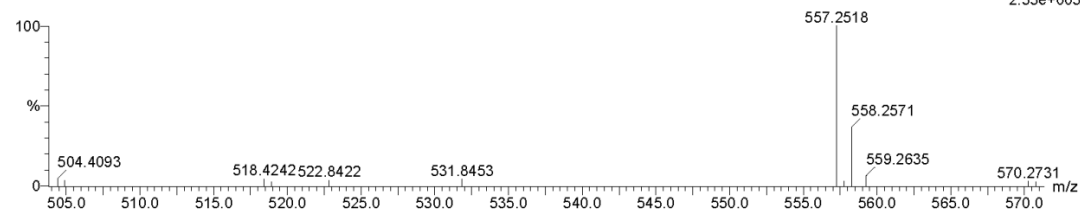

Minimum: -1.5  
 Maximum: 50.0 50.0 100.0

| Mass     | Calc. Mass | mDa  | PPM  | DBE  | i-FIT | i-FIT (Norm) | Formula         |
|----------|------------|------|------|------|-------|--------------|-----------------|
| 557.2518 | 557.2520   | -0.2 | -0.4 | 10.5 | 17.5  | 0.0          | C29 H36 N2 F6 P |

## Compound 2

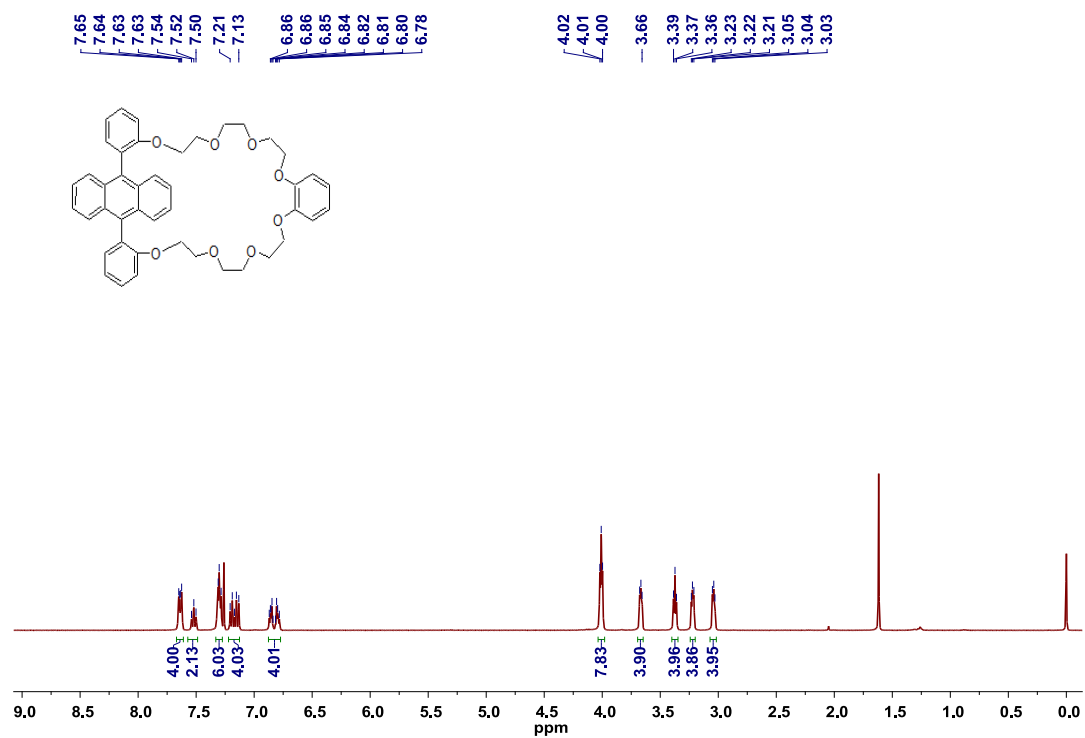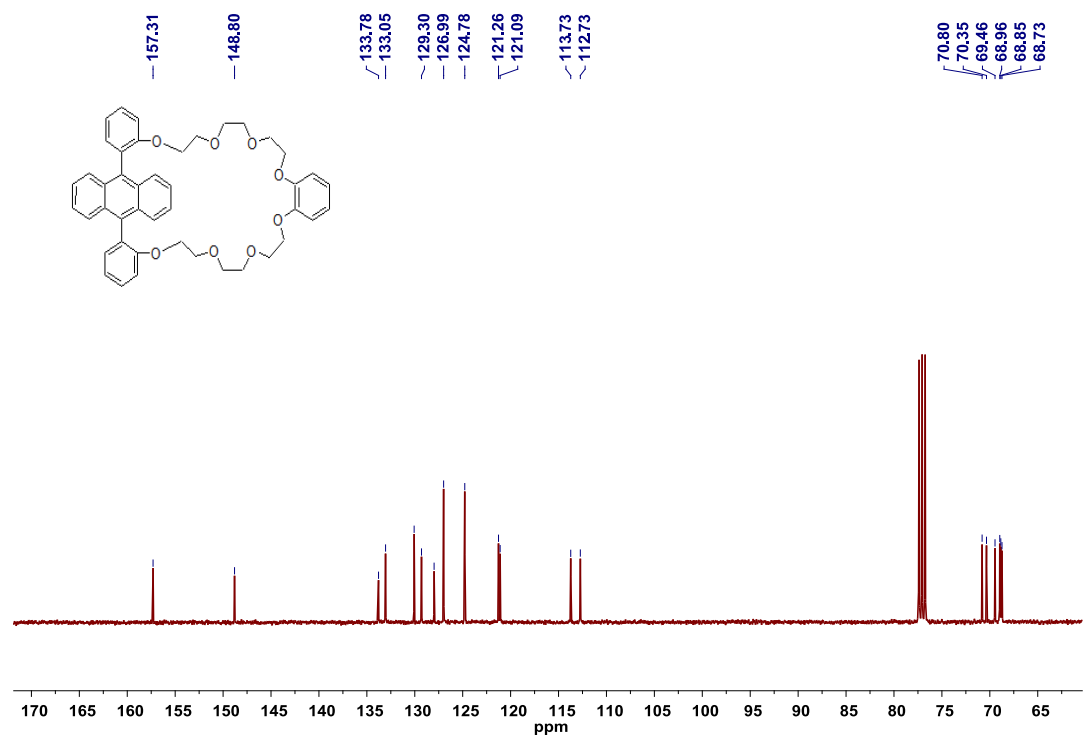

### Single Mass Analysis

Tolerance = 50.0 mDa / DBE: min = -1.5, max = 100.0  
 Element prediction: Off  
 Number of isotope peaks used for i-FIT = 2

Monoisotopic Mass, Even Electron Ions  
 20 formula(e) evaluated with 1 results within limits (up to 1 closest results for each mass)  
 Elements Used:  
 C: 0-44 H: 0-80 O: 0-8 Na: 0-1

H-TIAN

ECUST institute of Fine Chem

02-Dec-2012

12:28:15

1: TOF MS ES+

2.44e+003

TH-ZW-15 44 (1.428) Cm (38.45)

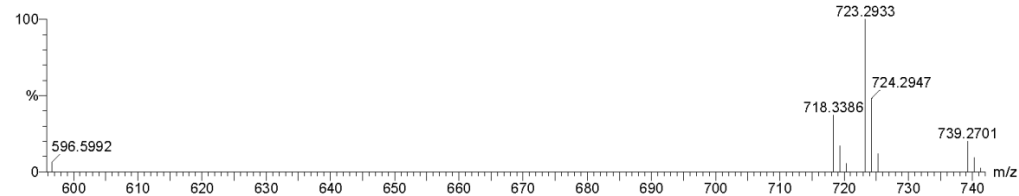

Minimum: -1.5  
 Maximum: 50.0 50.0 100.0

| Mass     | Calc. Mass | mDa  | PPM  | DBE  | i-FIT | i-FIT (Norm) | Formula       |
|----------|------------|------|------|------|-------|--------------|---------------|
| 723.2933 | 723.2934   | -0.1 | -0.1 | 22.5 | 8.8   | 0.0          | C44 H44 O8 Na |

### Compound 3-H

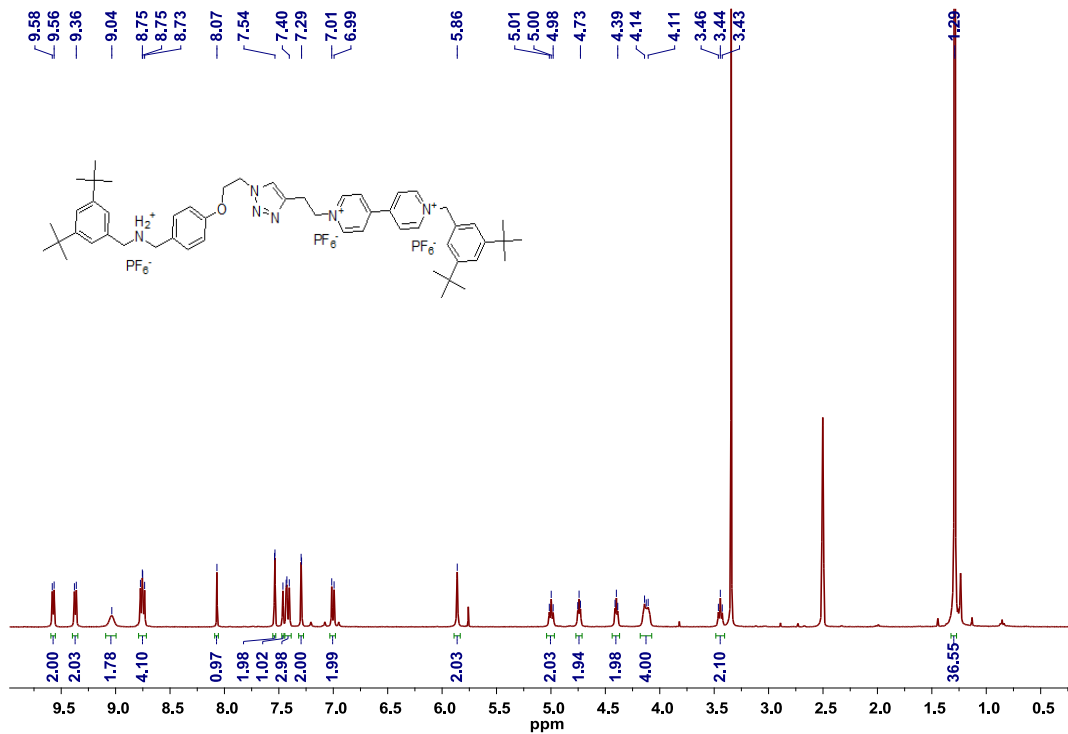

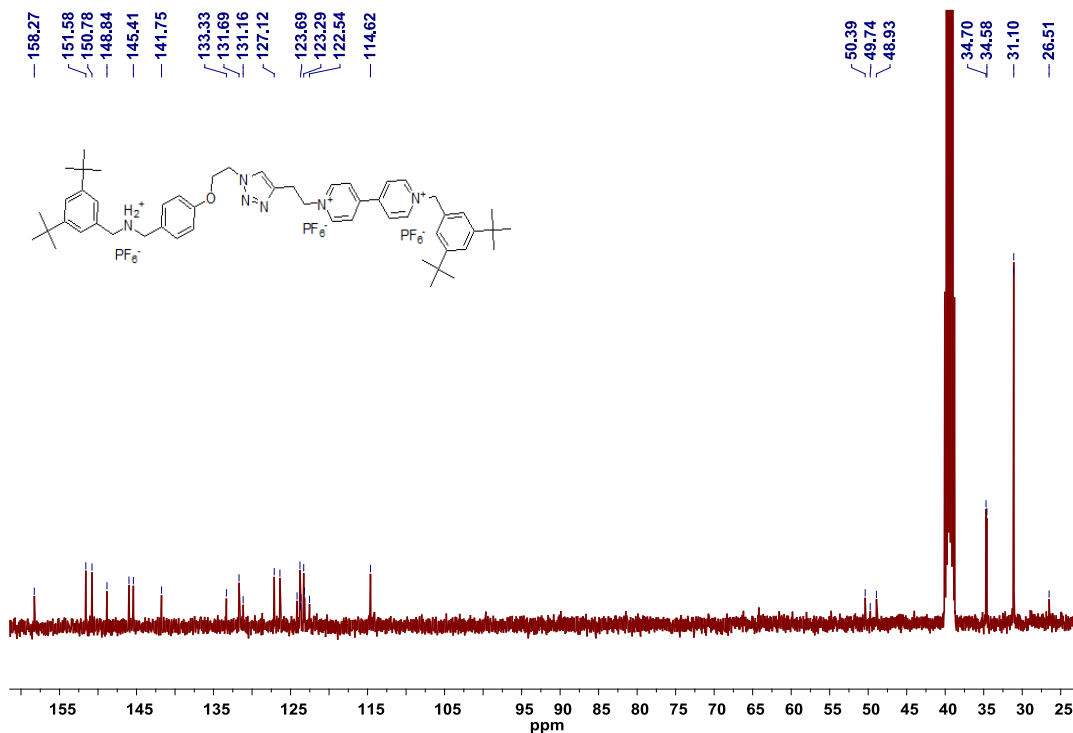

#### Single Mass Analysis

Tolerance = 50.0 mDa / DBE: min = -1.5, max = 100.0

Element prediction: Off

Number of isotope peaks used for i-FIT = 2

Monoisotopic Mass, Even Electron Ions

1920 formula(e) evaluated with 51 results within limits (up to 1 closest results for each mass)

Elements Used:

C: 0-53 H: 0-80 N: 0-6 O: 0-6 F: 0-12 P: 0-2

H-TIAN

ECUST institute of Fine Chem

02-Dec-2012

12:06:55

TH-ZW-14 44 (1.429) Cm (35.49)

1: TOF MS ES+

1.02e+004

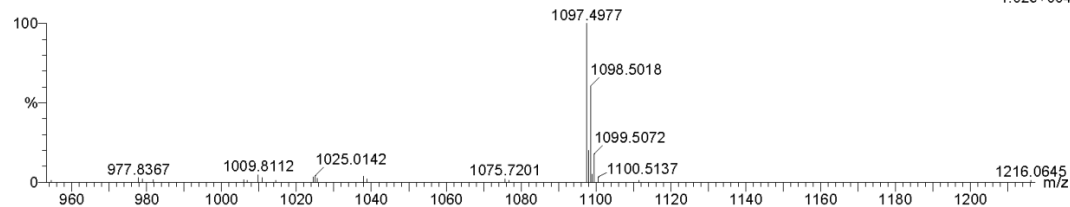

Minimum: -1.5  
 Maximum: 50.0 50.0 100.0

| Mass      | Calc. Mass | mDa | PPM | DBE  | i-FIT | i-FIT (Norm) | Formula             |
|-----------|------------|-----|-----|------|-------|--------------|---------------------|
| 1097.4977 | 1097.4973  | 0.4 | 0.4 | 16.5 | 25.5  | 0.0          | C53 H71 N6 O F12 P2 |

### Compound 1-H

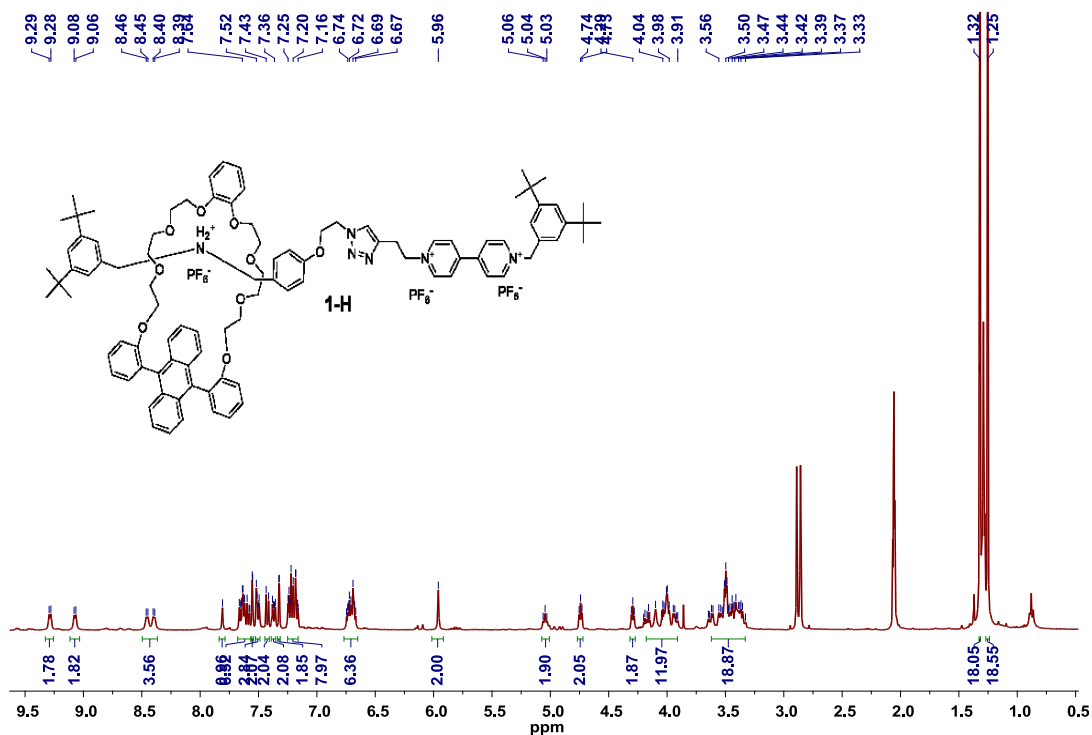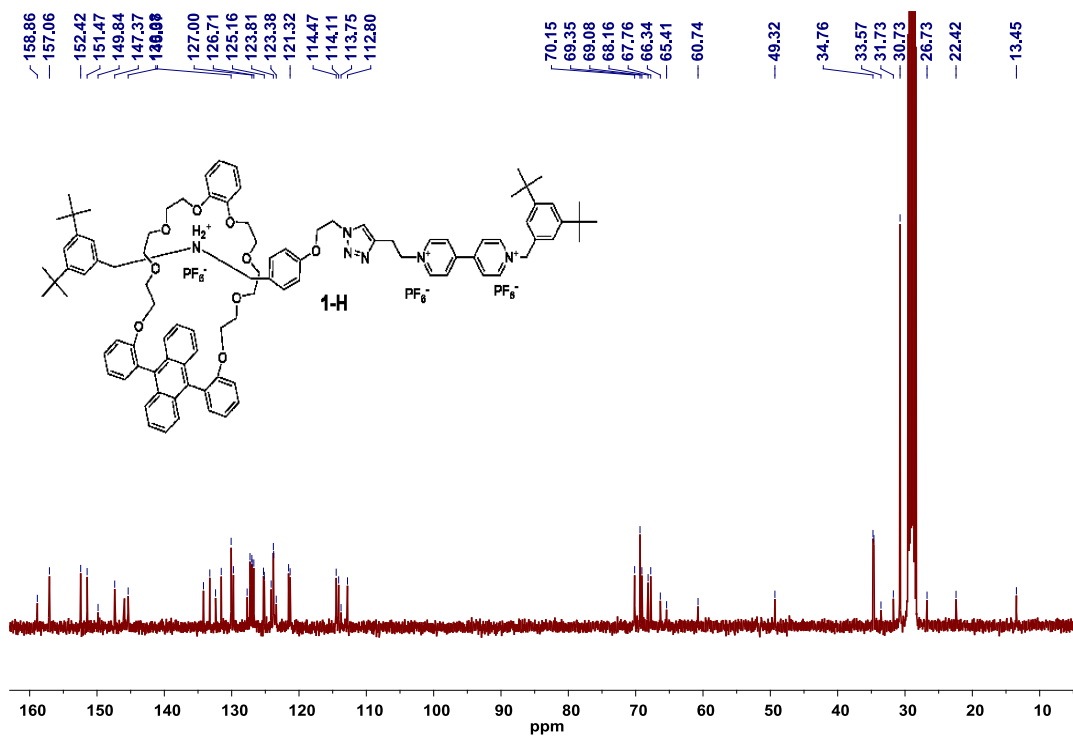

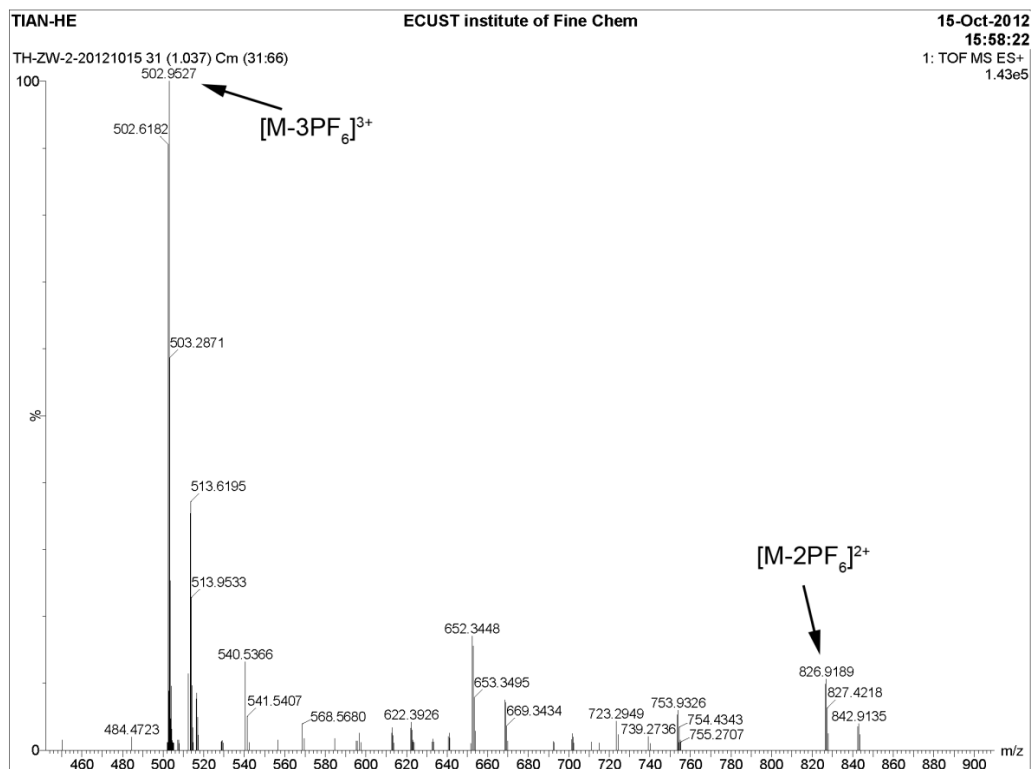

Supplement: c3ra46517a.pdf [file c3ra46517a.pdf]
